# Supplementary material for: COSMC knockdown mediated aberrant O-glycosylation promotes oncogenic properties in pancreatic cancer
Source: Springer Nature journal article supplement (doi:10.1186/s12943-015-0386-1), 2015-05-28

**Fig. S1**

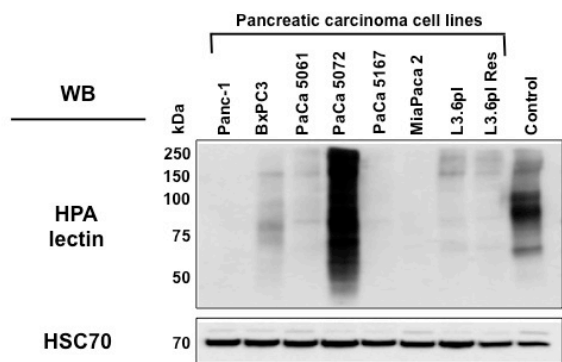

**Fig. S2**

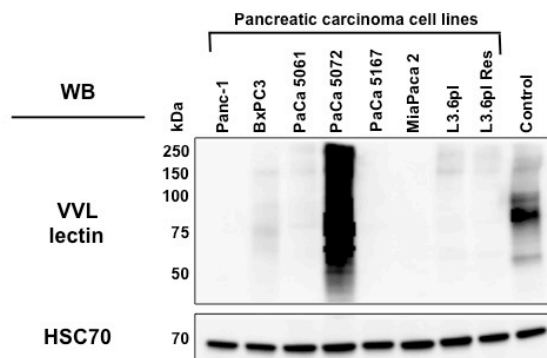

**Fig. S3**

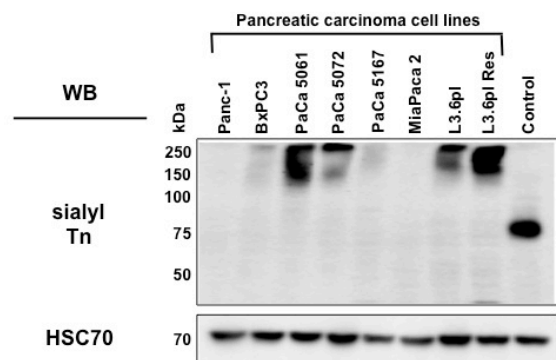

**Fig. S4**

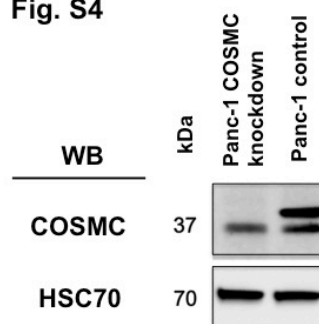

**Fig. S5**

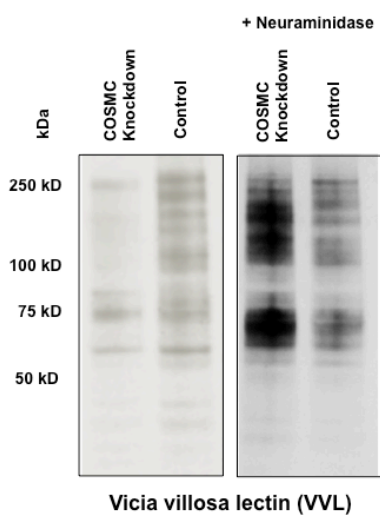

**Fig. S6**

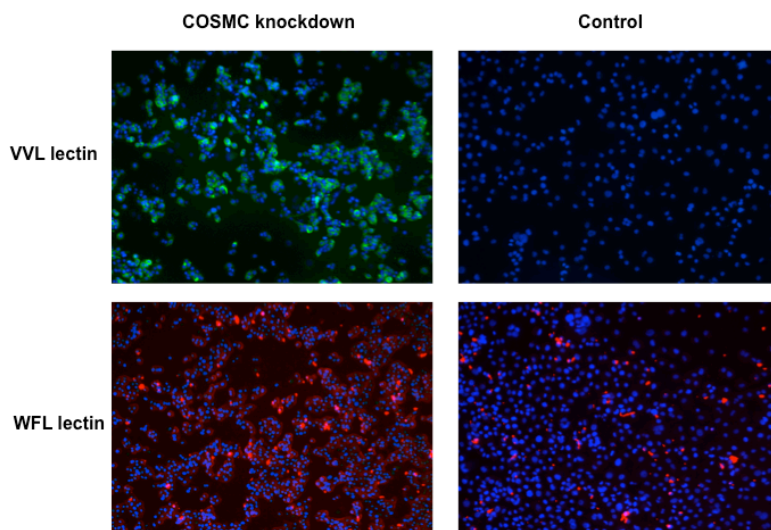

Fig. S7

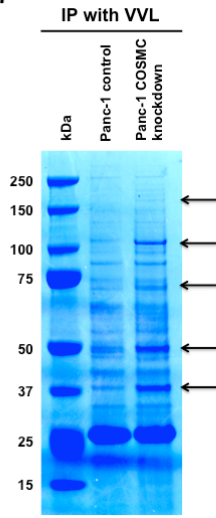

Fig. S8

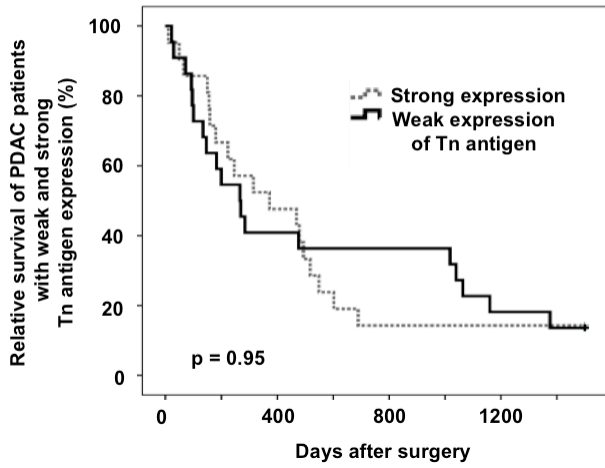

Fig. S9

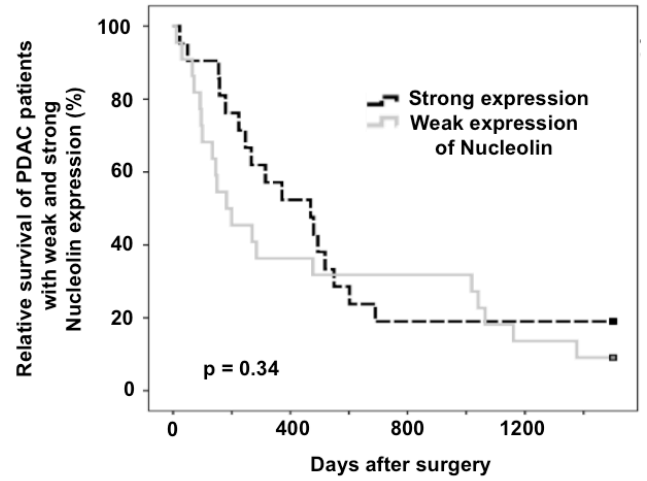

Fig. S10

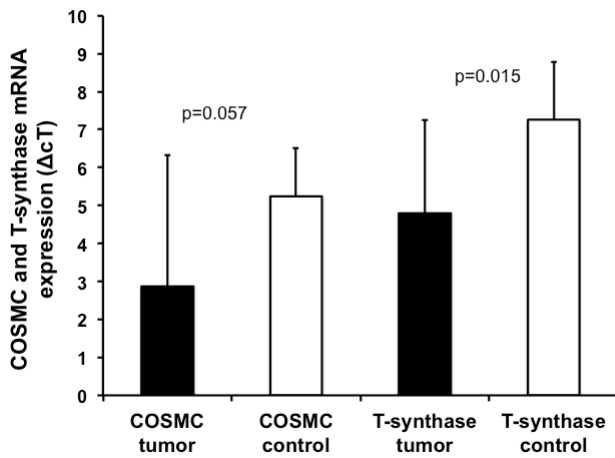

Fig. S11

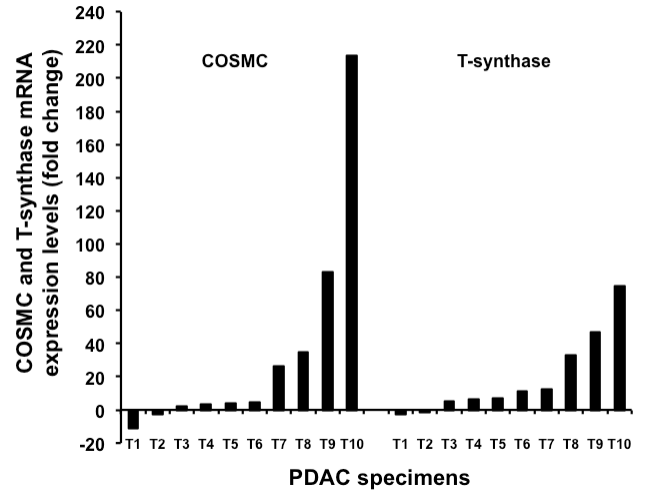

Supplement: MOESM1 [file 9763116]
